# Supplementary material
Source: publisher figshare collection journal article supplement (https://gsapubs.figshare.com/ndownloader/files/23030579)
Supplement: Supplementary file 1 [file 23030579]

| Name                            | Chemical formula                                                                                                          | Chemical composition<br>(oxides; %Wt; from literature)                                                                                                                                                                                                                             | Mineral type | CEC<br>meq/100g<br>(measured) | Surface area<br>m <sup>2</sup> /g (from literature) | Proportion in the Gironde eq. solution (10g/L) |
|---------------------------------|---------------------------------------------------------------------------------------------------------------------------|------------------------------------------------------------------------------------------------------------------------------------------------------------------------------------------------------------------------------------------------------------------------------------|--------------|-------------------------------|-----------------------------------------------------|------------------------------------------------|
| Kaolinite (KGa-1B)              | Al <sub>2</sub> Si <sub>2</sub> O <sub>5</sub> (OH) <sub>4</sub>                                                          | SiO <sub>2</sub> : 44.2, Al <sub>2</sub> O <sub>3</sub> : 39.7, TiO <sub>2</sub> : 1.39, Fe <sub>2</sub> O <sub>3</sub> : 0.13, FeO: 0.08, MnO: 0.002, MgO: 0.03, Na <sub>2</sub> O: 0.013, K <sub>2</sub> O: 0.05, F: 0.013, P <sub>2</sub> O <sub>5</sub> : 0.034 (3)            | 1:1          | 2                             | 10,05 (1)                                           | 7.4%                                           |
| Illite (Imt-2)                  | (K,H <sub>3</sub> O)(Al,Mg,Fe) <sub>2</sub> (Si,Al) <sub>4</sub> O <sub>10</sub> [(OH) <sub>2</sub> , (H <sub>2</sub> O)] | SiO <sub>2</sub> : 49.3, Al <sub>2</sub> O <sub>3</sub> : 24.25, TiO <sub>2</sub> : 0.55, Fe <sub>2</sub> O <sub>3</sub> : 7.32, FeO: 0.55, MnO: 0.03, MgO: 2.56, CaO: 0.43, K <sub>2</sub> O: 7.83, P <sub>2</sub> O <sub>5</sub> : 0.08 (3)                                      | 1:2          | 4                             | 105 (1)                                             | 57.3%                                          |
| Ca-rich Montmorillonite (Saz-2) | (Na,Ca) <sub>0.3</sub> (Al,Mg) <sub>2</sub> Si <sub>4</sub> O <sub>10</sub> (OH) <sub>2</sub>                             | SiO <sub>2</sub> : 60.4, Al <sub>2</sub> O <sub>3</sub> : 17.6, TiO <sub>2</sub> : 0.24, Fe <sub>2</sub> O <sub>3</sub> : 1.42, FeO: 0.08, MnO: 0.099, MgO: 6.46, CaO: 2.82, Na <sub>2</sub> O: 0.063, K <sub>2</sub> O: 0.19, F: 0.287, P <sub>2</sub> O <sub>5</sub> : 0.020 (3) | 1:2          | 114                           | 97,42 (2)                                           | 27.8%                                          |
| Ripidolite (Cca-2)              | (Fe,Mg,Al) <sub>6</sub> (Si,Al) <sub>4</sub> O <sub>10</sub> (OH) <sub>8</sub>                                            | SiO <sub>2</sub> : 26.0, Al <sub>2</sub> O <sub>3</sub> : 20.0, TiO <sub>2</sub> : 0.476, Fe <sub>2</sub> O <sub>3</sub> : 26.6, FeO: 20.8, MnO: 0.1, MgO: 17.2, CaO: 0.25, Na <sub>2</sub> O: <0.1, K <sub>2</sub> O: <0.1, P <sub>2</sub> O <sub>5</sub> : 0.02 (3)              | 1:2          | 0                             | 2,5 (4)                                             | 11.1%                                          |

Table S1. Properties of clay mineral standards (The Clay Minerals Society; Chantilly, USA) used in clay-sand-EPS experiments.

| <b>Mechanism</b>          | <b>Organic functional groups</b>                     |
|---------------------------|------------------------------------------------------|
| Cation exchange           | Amino                                                |
| Cations bridging          | Carboxylate, sulfate, alcoholic OH, carbonyl, amines |
| Water bridging            | Carboxylate, sulfate, alcoholic OH, carbonyl, amines |
| Hydrogen bonding          | Amino, carboxyl, alcoholic OH, carbonyl              |
| Van der Waals interaction | Uncharged organic unit/moiety                        |

Table S2. Potential mechanisms of interaction between EPS and mineral surfaces.

| Wavenumber (cm <sup>-1</sup> ) | Vibrational modes                                                                                                                      |
|--------------------------------|----------------------------------------------------------------------------------------------------------------------------------------|
| 3000-4000                      | O-H/N-H vibrations                                                                                                                     |
| 2800-3000                      | Symmetric and antisymmetric stretching of C-H from CH <sub>2</sub> and CH <sub>3</sub> groups                                          |
| 1733                           | Stretching of C=O in protonated carboxylic acid group                                                                                  |
| 1636                           | Stretching of C=O in amide (amide I)                                                                                                   |
| 1540                           | N-H bending and C-N stretching in amide (amide II)                                                                                     |
| 1450                           | CH <sub>2</sub> scissoring                                                                                                             |
| 1373                           | Symmetric stretching of COO <sup>-</sup>                                                                                               |
| 1247                           | Vibrations of -COOH and C-O-C group in esters                                                                                          |
| 1210                           | Stretching of P=O bond in phosphate                                                                                                    |
| 950-1150                       | Asymmetric and symmetric stretching of PO <sub>2</sub> <sup>-</sup> ; vibrations of C-OH and C-C bonds in polysaccharides and alcohols |

Table S3. FTIR Absorption bands of Gironde diatom biofilm EPS.

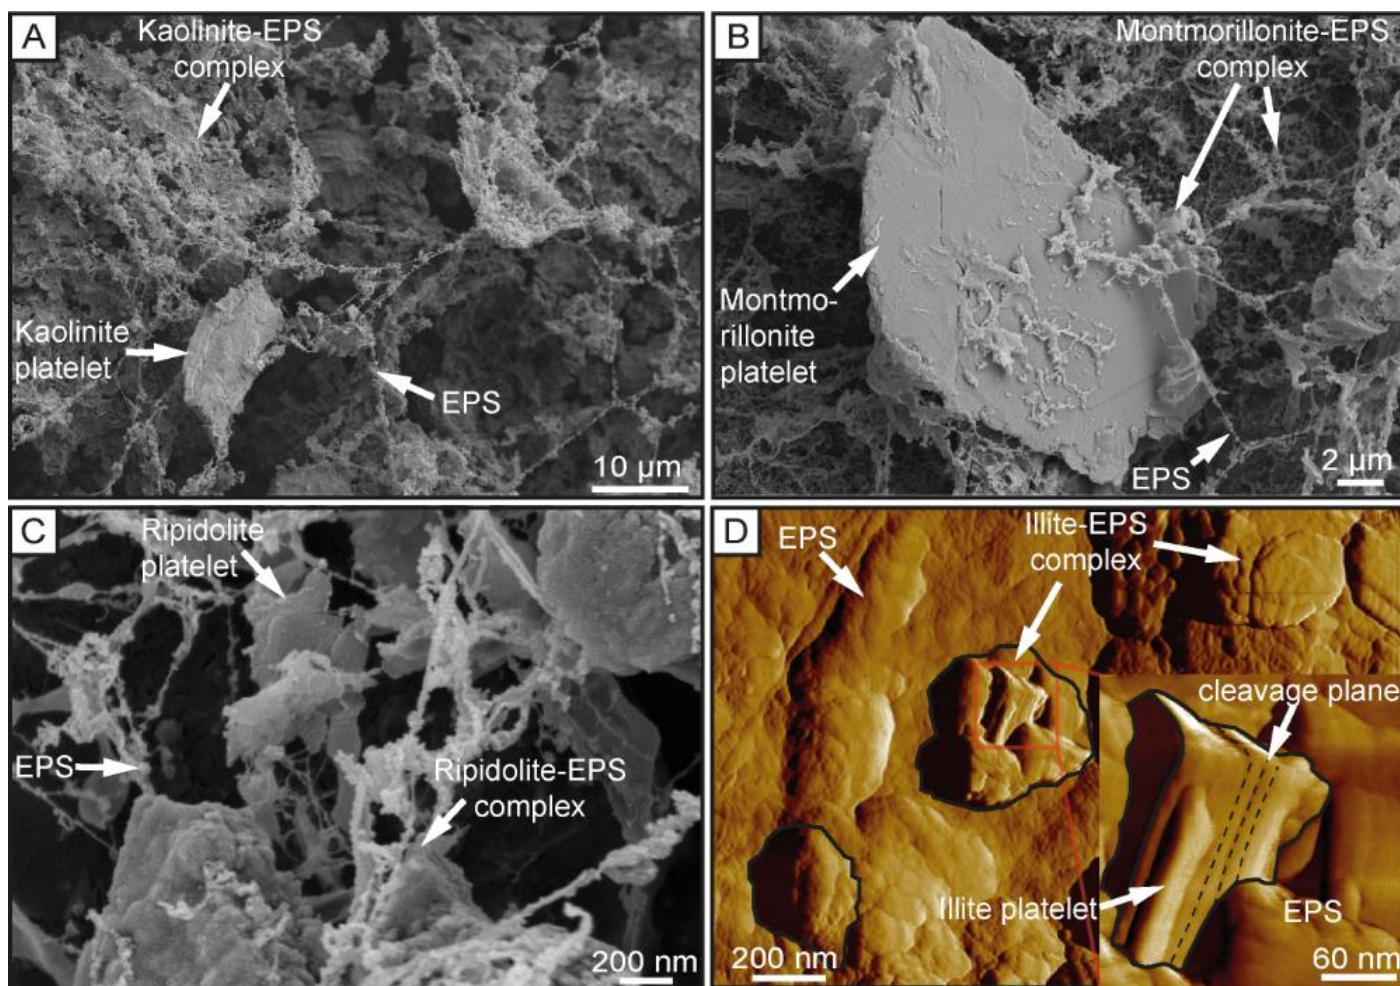

Figure S1. Experiments of interactions between EPS and the four species of standard clay minerals (Table S1). For each experiment, we prepared a solution of 245  $\mu\text{L}$  of EPS solution and 105  $\mu\text{L}$  of 10g/L clay suspension. (A) SEM image of the kaolinite (KGa-1b)-EPS experiment. The EPS matrix forms a complex with kaolinite platelets. (B) SEM image of the montmorillonite (Saz-2)-EPS experiment. The clay platelet is covered by EPS. (C) SEM image of ripidolite (Cca-2)-EPS experiment. An organo-mineral complexes is formed between EPS fibers and ripidolite platelets. (D) AFM image of the illite (lmt-2)-EPS experiment. Clay platelets are embedded within the EPS organic matrix. A close-up view shows the cleavage plane of the illite crystal.

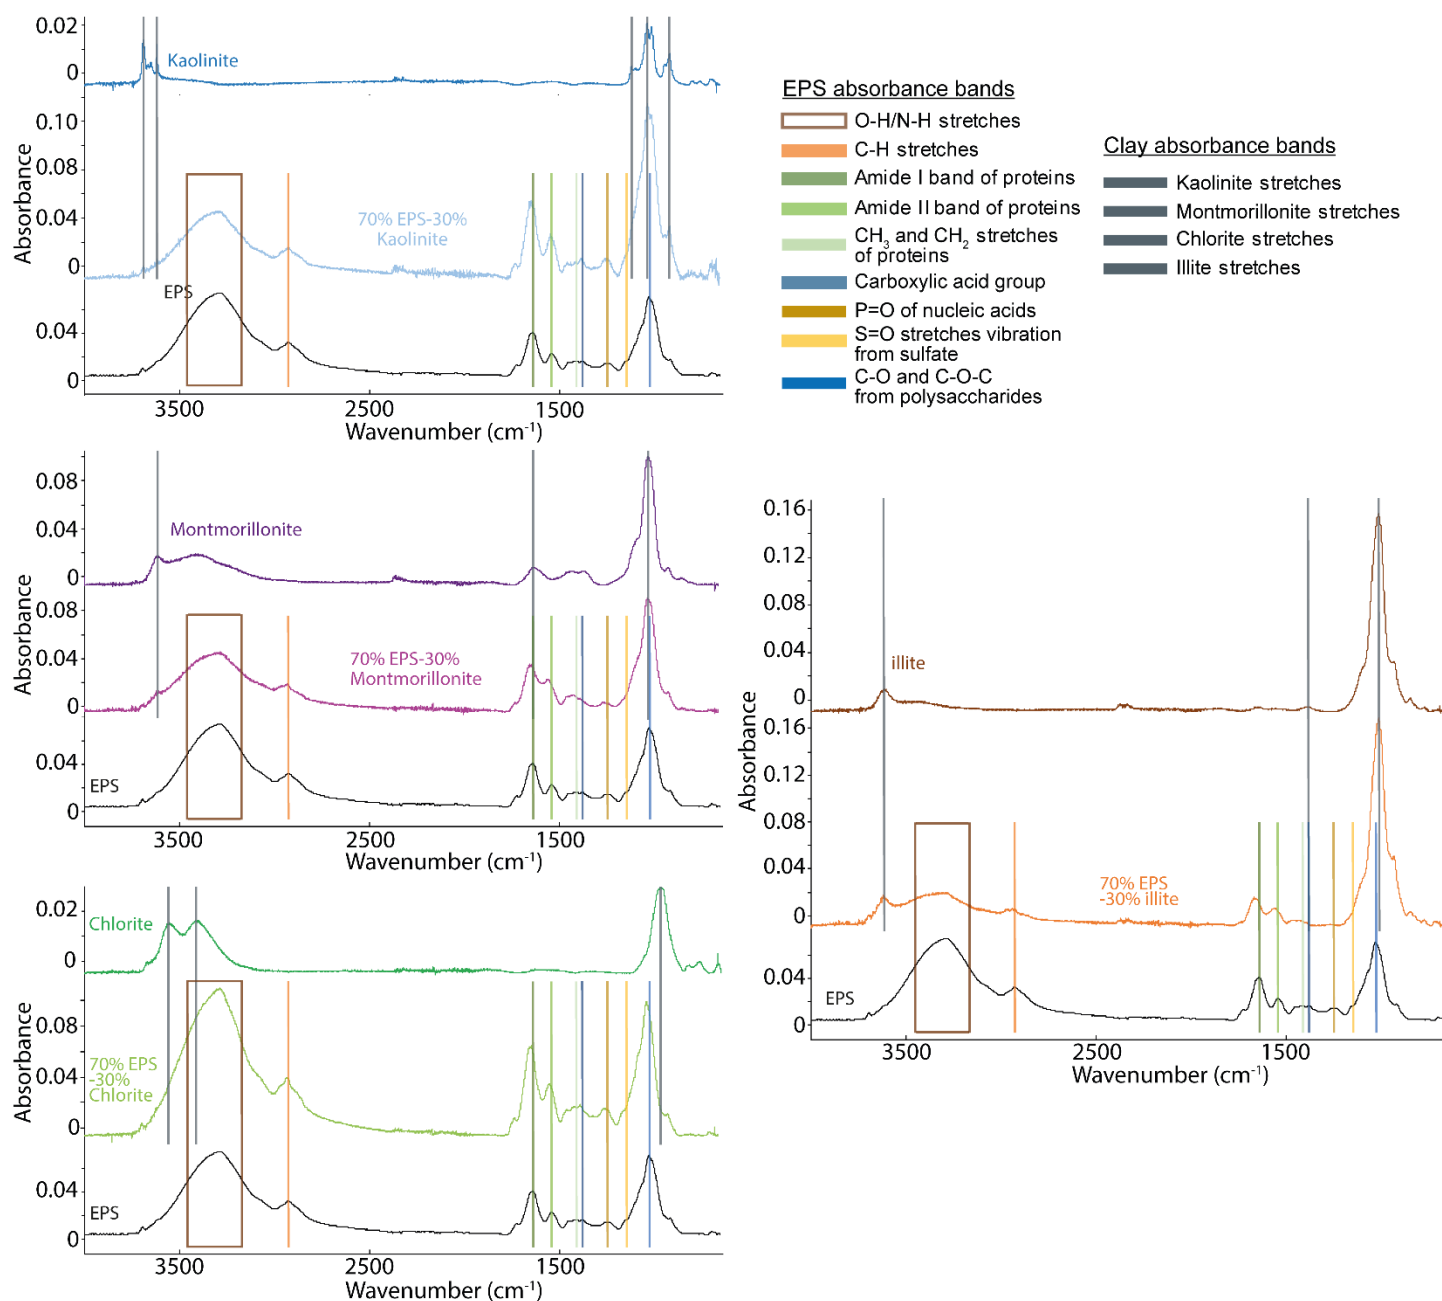

Figure S2. FTIR spectra of EPS and clay standard minerals experiments. See the caption of Fig. S2 and main text for detailed about experimental procedures.

## References:

- (1) Kahr, G., and Madsen, F.T., 1995, Determination of the cation exchange capacity and the surface area of bentonite, illite and kaolinite by methylene blue adsorption: *Applied Clay Science*, v. 9, p. 327–336.
- (2) Lorenz, P.M., Meier, L., and Kahr, G., 1999, Determination of the cation exchange capacity (CEC) of clay minerals using the complexes of copper (II) ion with triethylenetetramine and tetraethylenepentamine: *Clays and clay minerals*, v. 47, p. 386–388.
- (3) Mermut, A.R., and Cano, A.F., 2001, Baseline studies of the clay minerals society source clays: chemical analyses of major elements: *Clays and Clay Minerals*, v. 49, p. 381–386.
- (4) Sondi, I., Stubičar, M., and Pravdić, V., 1997, Surface properties of ripidolite and beidellite clays modified by high-energy ball milling: *Colloids and Surfaces A: Physicochemical and Engineering Aspects*, v. 127, p. 141–149.
